# Supplementary material for: Ultrafast electronic energy relaxation in a conjugated dendrimer leading to inter-branch energy redistribution
Source: Royal Society of Chemistry journal article supplement (doi:10.1039/c6cp04448d), 2016-01-01
Supplement: c6cp04448d1.pdf [file c6cp04448d1.pdf]

## Supplementary Information

### Ultrafast electronic energy relaxation in a conjugated dendrimer leading to inter-branch energy redistribution

D. Ondarse-Alvarez<sup>a</sup>, S. Kömürlü<sup>b</sup>, A. E. Roitberg<sup>c</sup>, G. Pierdominici-Sottile<sup>a</sup>, S. Tretiak<sup>d</sup>, S. Fernandez-Alberti<sup>a\*</sup>, and V. Kleiman<sup>c\*</sup>

<sup>a</sup> *Departamento de Ciencia y Tecnología, Universidad Nacional de Quilmes/CONICET, B1876BXD Bernal, Argentina*

<sup>b</sup> *700,73rd St Dowers Grove 60516 IL*

<sup>c</sup> *Department of Chemistry of Chemistry, University of Florida, Gainesville, Florida 32611, USA.*

<sup>d</sup> *Theoretical Division, Center for Nonlinear Studies (CNLS), and Center for Integrated Nanotechnologies (CINT), Los Alamos National Laboratory, Los Alamos, NM 87545, USA.*

**Figure S1.** Atom types and RESP charges of Ph<sub>3</sub>PG-1

**Figure S2.** Chemical structure of 1,4- bis(phenylethynyl)benzene

**Figure S3.** Steady state emission spectra of dendrimer **1** (black) and 1,4-bis(phenylethynyl)benzene (green) in THF.
