# Supplementary material for: Ultrafast electronic energy relaxation in a conjugated dendrimer leading to inter-branch energy redistribution
Source: Royal Society of Chemistry journal article supplement (doi:10.1039/c6cp04448d), 2016-01-01
Supplement: c6cp04448d3.pdf [file c6cp04448d3.pdf]

Electronic Supplementary Material (ESI) for Physical Chemistry Chemical Physics.  
This journal is © the Owner Societies 2016
