# Supplementary figures and images for: Ultrafast electronic energy relaxation in a conjugated dendrimer leading to inter-branch energy redistribution
Source: Royal Society of Chemistry journal article supplement (doi:10.1039/c6cp04448d), 2016-01-01

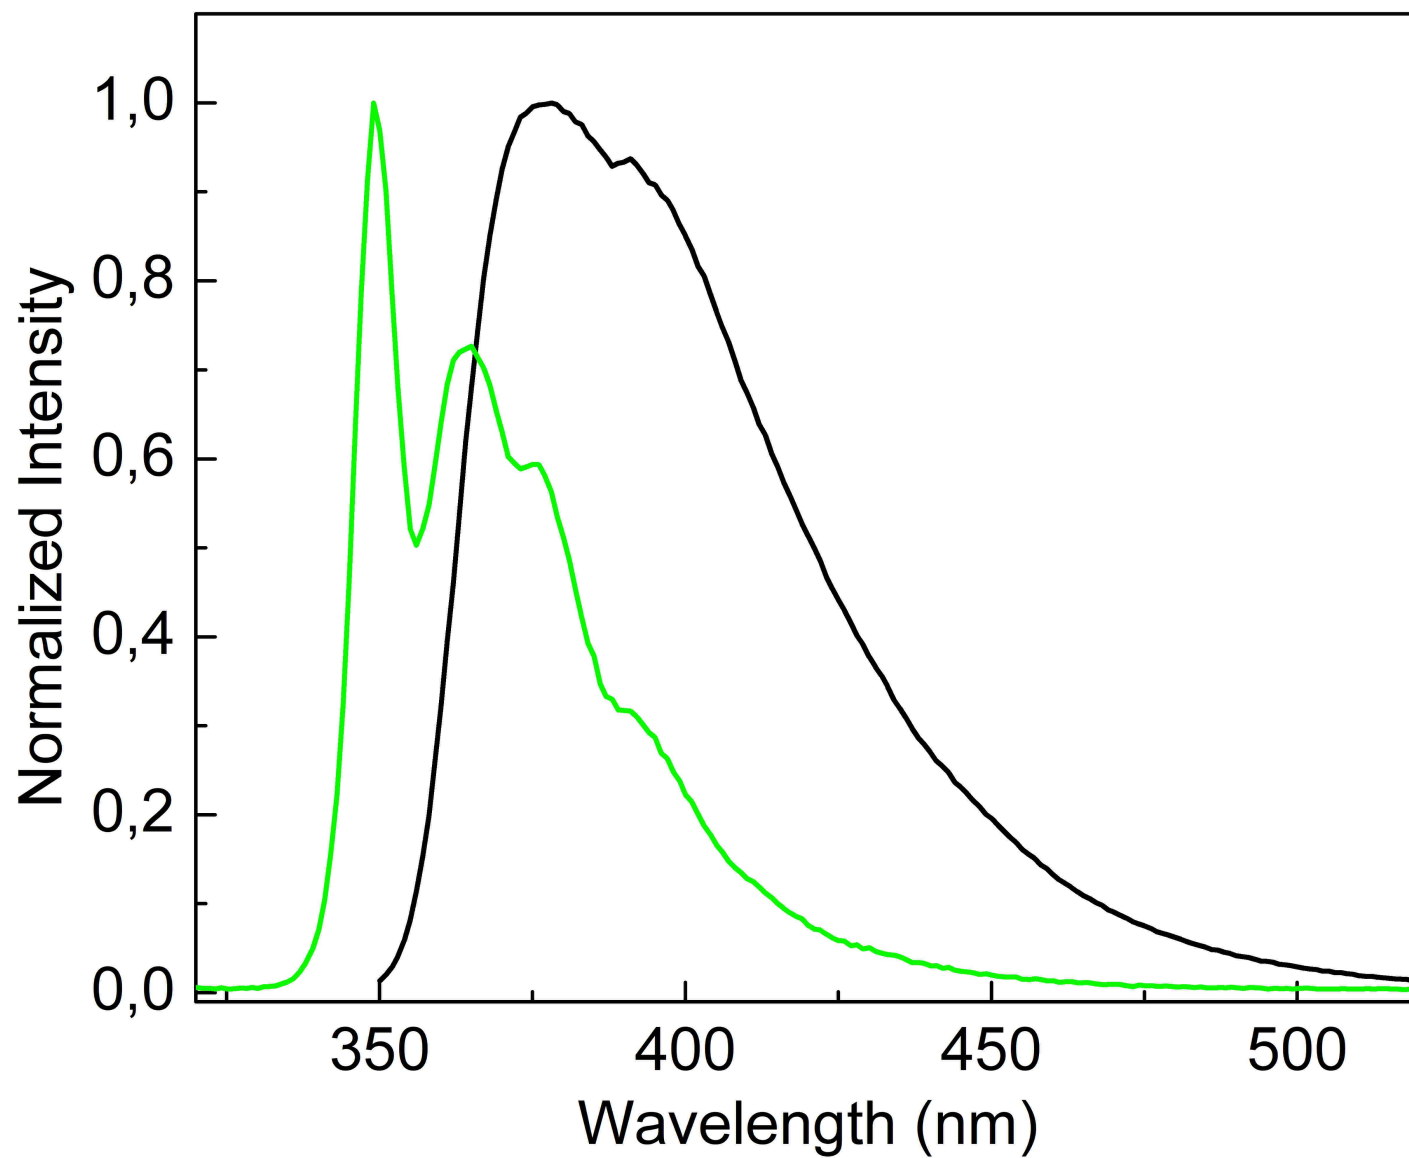

Supplement: c6cp04448d2.pdf [file c6cp04448d2.pdf]



Supplement: c6cp04448d4.pdf [file c6cp04448d4.pdf]
